# Supplementary material for: A dual-functional Pt/CNT TCO-free counter electrode for dye-sensitized solar cell
Source: Royal Society of Chemistry journal article supplement (doi:10.1039/c2jm35102a), 2012-01-01
Supplement: c2jm35102a.pdf [file c2jm35102a.pdf]

## Electronic Supplementary Information

# **A Dual-Functional Pt/CNT TCO-Free Counter Electrode for Dye-Sensitized Solar Cells**

*Chung-Te Liu<sup>a</sup>, Ying-Chiao Wang<sup>a</sup>, Rui-Xuan Dong<sup>a</sup>, Kuan-Chieh Huang<sup>b</sup>, Chun-Chieh Wang<sup>b</sup>,  
Kuo-Chuan Ho<sup>\*,a,b</sup> and Jiang-Jen Lin<sup>\*,a</sup>*

<sup>a</sup>Institute of Polymer Science and Engineering, <sup>b</sup>Department of Chemical Engineering, National Taiwan  
University, Taipei 10617, Taiwan

\* Corresponding authors: Tel: +886-2-2366-0739, Fax: +886-2-2362-3040, E-mail: kcho@ntu.edu.tw  
(K. C. Ho); Tel: +886-2-3366-5312, Fax: +886-2-3366-5237, E-mail: jianglin@ntu.edu.tw (J. J. Lin).

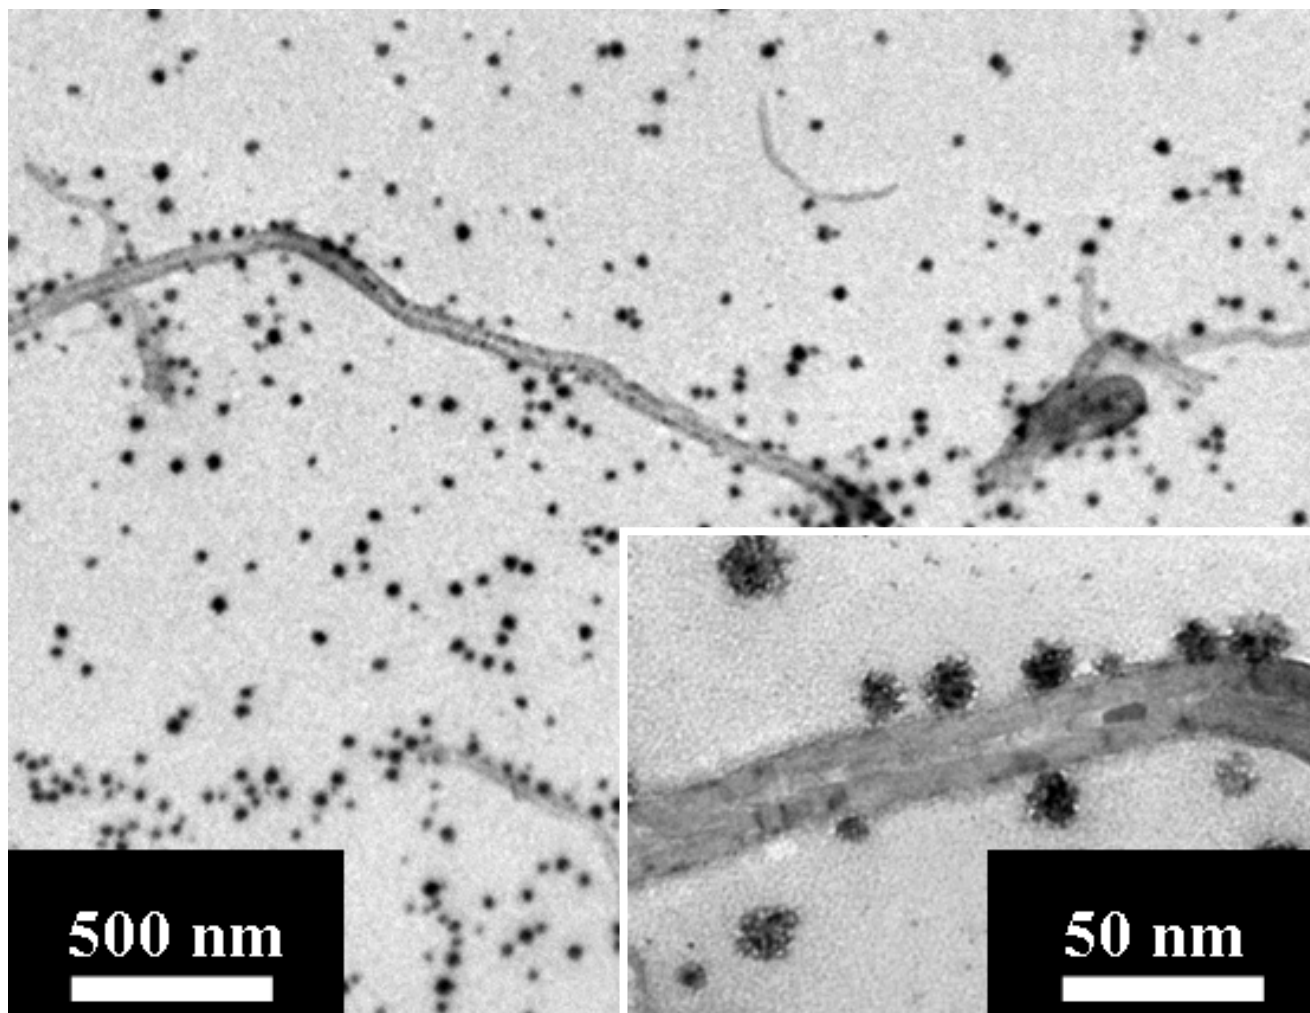

**Figure S1.** TEM image of PtNP/CNT, obtained by the dispersion in POEM.

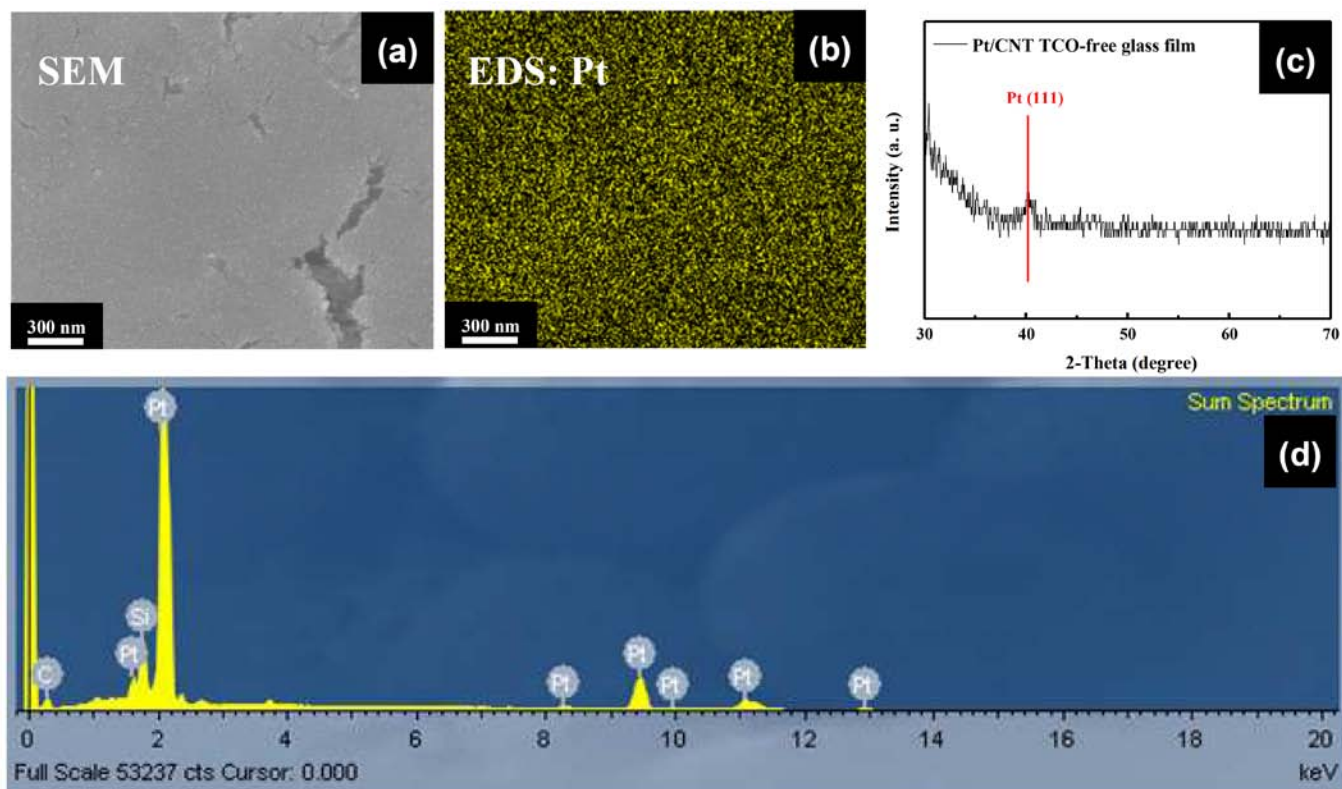

**Figure S2.** (a) SEM image, (b) EDS mapping image, (c) XRD pattern, and (d) EDS spectra of the film of Pt/CNT.

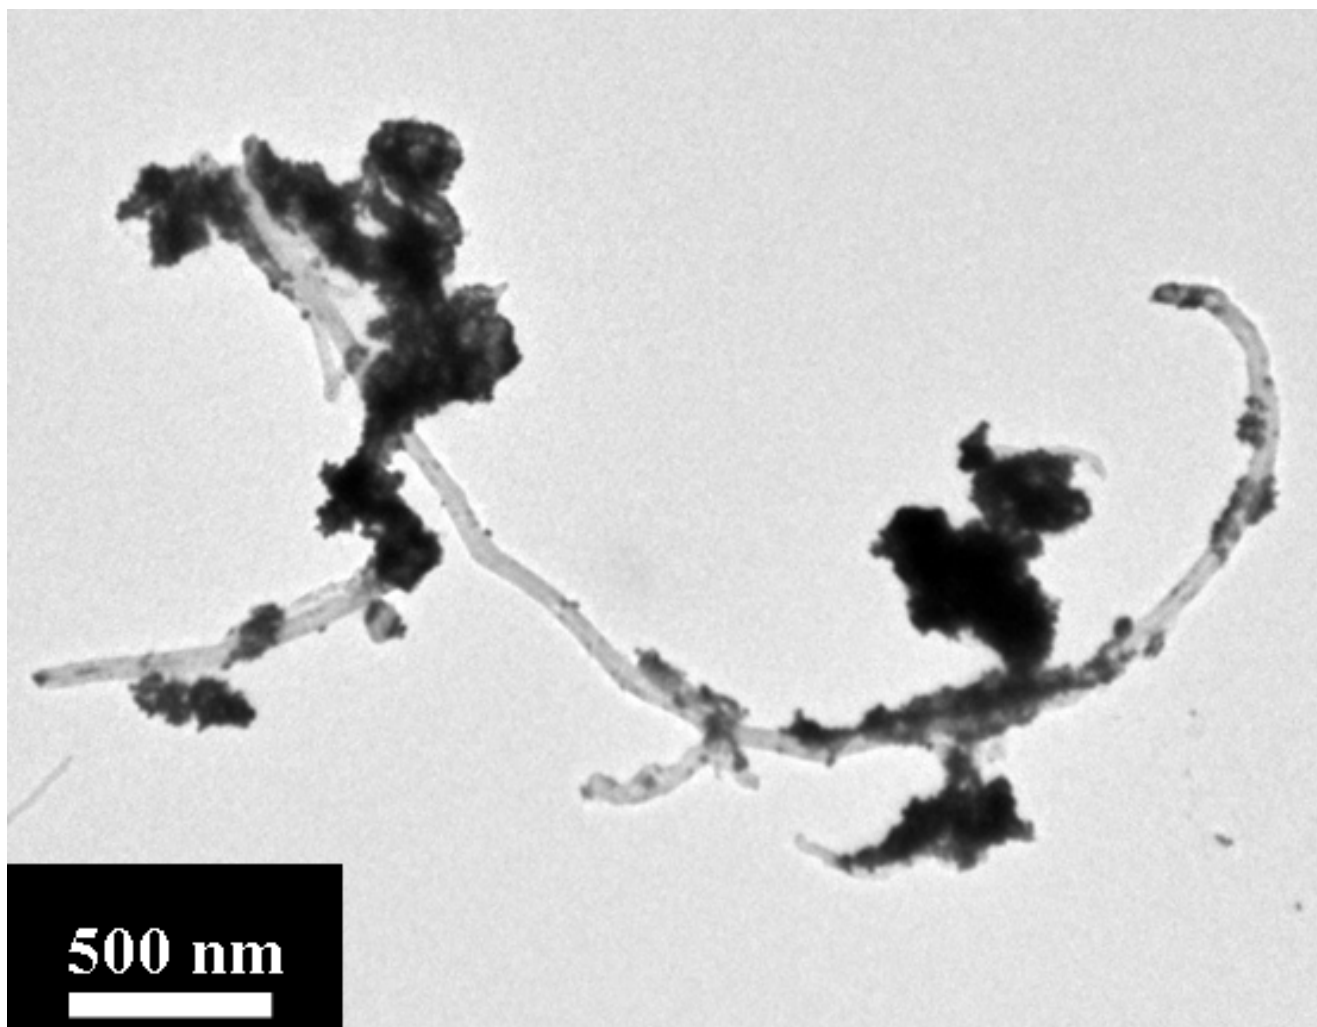

**Figure S3.** TEM image of the film of PtNPs/CNT, obtained in the absence of the dispersant POEM and annealed at 80 °C.
